# Supplementary material
Source: PubMed Central journal article supplement (PMC2638567)

**Supplemental information:**

**Supplemental Table 1. Oligonucleotide primer sequences**

| Primers       | Sequence (5' - 3')     | Amino acid | Fragment (bp) |
|---------------|------------------------|------------|---------------|
| HRC_Exon1_1F  | CCCTATTGGCTGGGGAATG    | 5'UTR, 1-  | 281           |
| HRC_Exon1_1R  | CCCAGAGGACAGAAGCGTG    | 14         |               |
| HRC_Exon1_2F  | CAGTGTGCCTGTCCGTC      | 1-81       | 264           |
| HRC_Exon1_2R  | ATGATGCCCATTTCTCTGTGG  |            |               |
| HRC_Exon1_3F  | ATCAGCAGAGCTTCGCCAC    | 52-142     | 271           |
| HRC_Exon1_3R  | TTCCGTGTCTTCACTCCCG    |            |               |
| HRC_Exon1_4F  | GTCGGAGATGAGGGTGTCTC   | 112-210    | 296           |
| HRC_Exon1_4R  | TGTCCATACTCAGTGGAGGC   |            |               |
| HRC_Exon1_5F  | TCATATCCTCAGGCATGGAC   | 174-269    | 285           |
| HRC_Exon1_5R  | GCCTGGTGTCTATATTCAATGG |            |               |
| HRC_Exon1_6F  | TCTCAGATGGACACCATCATCA | 226-327    | 304           |
| HRC_Exon1_6R  | TCTTCCTTTCTGTGGTCTTGGT |            |               |
| HRC_Exon1_7F  | AGGCACCGAAGCCATGAAG    | 295-392    | 292           |
| HRC_Exon1_7R  | TTGCAACATAGTGCCGAAC    |            |               |
| HRC_Exon1_8F  | GATGTGTCCACTGAACGTTGGC | 355-445    | 270           |
| HRC_Exon1_8R  | GTGGCTTTGCCTGTGGCTG    |            |               |
| HRC_Exon1_9F  | CCTCACCATCACCACCACAG   | 414-498    | 252           |
| HRC_Exon1_9R  | GTCTTCCTCATGGGAGCCG    |            |               |
| HRC_Exon1_10F | AAGGATAGAAGCCATTTGAGG  | 471-558    | 261           |
| HRC_Exon1_10R | AACCTCAGCCCTCTCTTCC    |            |               |
| HRC_Exon1_11F | TCAGCCTGAACCAGGAGGAG   | 527-610    | 296           |
| HRC_Exon1_11R | CAGGCTGACTCGGTTCCCTTC  |            |               |
| HRC_Exon2F    | GTGGGAAGGAACCGAGTCAG   | 611-633    | 174           |
| HRC_Exon2R    | GGGACAGATTCTGGGGACAC   |            |               |
| HRC_Exon3F    | CCTCCAAGTGGCGTTAGAG    | 634-656    | 165           |
| HRC_Exon3R    | ATCCTGAGGCCCAGTGGAG    |            |               |
| HRC_Exon4F    | CCCATCCTAACTCCGCC      | 657-674    | 185           |
| HRC_Exon4R    | ACCAGGATTCACCACGCTG    |            |               |
| HRC_Exon5F    | GTGGCTGCCTAATTTTGCTC   | 675-686    | 138           |
| HRC_Exon5R    | CTAAACGGGGCTTTTACACG   |            |               |
| HRC_Exon6F    | GGCTTTGAACACCAGCTGTC   | 687-699,   | 219           |
| HRC_Exon6R    | ATGCCCTGAGATTCCAGAC    | 3'UTR      |               |

**Supplemental Table 2. Hardy-Weinberg Equilibrium Analysis**

| <i>HRC Variant</i>                        | Overall (n=219) |                   |       |                    |                       | DCM (n=123) |                   |       |                    |                       | Controls (n=96) |                   |       |                    |                       |
|-------------------------------------------|-----------------|-------------------|-------|--------------------|-----------------------|-------------|-------------------|-------|--------------------|-----------------------|-----------------|-------------------|-------|--------------------|-----------------------|
|                                           | $\chi^2$        | $\chi^2 p$ -value | LR    | LR <i>p</i> -value | Exact <i>p</i> -value | $\chi^2$    | $\chi^2 p$ -value | LR    | LR <i>p</i> -value | Exact <i>p</i> -value | $\chi^2$        | $\chi^2 p$ -value | LR    | LR <i>p</i> -value | Exact <i>p</i> -value |
| <b>Leu35Leu (A<b>Δ</b>G)</b>              | 0.371           | 0.542             | 0.372 | 0.542              | 0.565                 | 0.191       | 0.662             | 0.192 | 0.662              | 0.683                 | 0.181           | 0.670             | 0.182 | 0.670              | 0.832                 |
| <b>Ser43Asn (G<b>Δ</b>A)</b>              | 0.106           | 0.745             | 0.106 | 0.745              | 0.765                 | 0.106       | 0.745             | 0.106 | 0.745              | 0.837                 | 0.610           | 0.435             | 0.611 | 0.434              | 0.401                 |
| <b>Ser96Ala (T<b>Δ</b>G)</b>              | 0.342           | 0.558             | 0.342 | 0.558              | 0.591                 | 0.647       | 0.421             | 0.648 | 0.421              | 0.549                 | 0.005           | 0.945             | 0.005 | 0.945              | 1.000                 |
| <b>Glu202_Glu203insGlu (-<b>Δ</b>GAG)</b> | 0.846           | 0.358             | 0.848 | 0.357              | 0.315                 | 0.080       | 0.777             | 0.080 | 0.777              | 0.698                 | 1.097           | 0.295             | 1.102 | 0.294              | 0.294                 |
| <b>Asp261del (GAT<b>Δ</b>-)</b>           | 2.512           | 0.113             | 2.514 | 0.113              | 0.119                 | 1.568       | 0.211             | 1.568 | 0.210              | 0.238                 | 0.948           | 0.330             | 0.949 | 0.330              | 0.429                 |
| <b>His321ins51aa</b>                      | 0.065           | 0.799             | 0.127 | 0.721              | 1.000                 | 0.042       | 0.838             | 0.082 | 0.775              | 0.039                 | 0.024           | 0.876             | 0.048 | 0.827              | 1.000                 |

LR, Likelihood Ratio

**Supplemental Table 3. Statistical Analysis of Clinical Parameters and Genotypes (One Way ANOVA,  $\chi^2$ , and Fisher Exact Test)**

| Genotype                   | NYHA Classification |          | AF              |          | LBBB            |          | LVEF    |          | LVEDD   |          | LVESD   |          | ICD<br>(History of sustained VT or VF) |              | Unexplained Syncope |          |
|----------------------------|---------------------|----------|-----------------|----------|-----------------|----------|---------|----------|---------|----------|---------|----------|----------------------------------------|--------------|---------------------|----------|
|                            | $\chi^2$            | <i>p</i> | $\chi^2$        | <i>p</i> | $\chi^2$        | <i>p</i> | F-ratio | <i>p</i> | F-ratio | <i>p</i> | F-ratio | <i>p</i> | $\chi^2$                               | <i>p</i>     | $\chi^2$            | <i>p</i> |
|                            | (DF)                |          | (DF)            |          | (DF)            |          |         |          |         |          |         |          | (DF)                                   |              | (DF)                |          |
| <b>Leu35Leu</b>            | 4.596<br>(4)        | 0.331    | 3.662<br>(2)    | 0.160    | 0.409<br>(2)    | 0.815    | 0.352   | 0.788    | 0.747   | 0.526    | 0.541   | 0.659    | 0.818<br>(2)                           | 0.664        | 0.850<br>(2)        | 0.654    |
| <b>Ser43Asn</b>            | 7.726<br>(4)        | 0.102    | 0.170<br>(2)    | 0.919    | 0.235<br>(2)    | 0.889    | 0.066   | 0.978    | 0.337   | 0.798    | 0.408   | 0.748    | 0.152<br>(2)                           | 0.927        | 1.295<br>(2)        | 0.523    |
| <b>Ser96Ala</b>            | 1.314<br>(4)        | 0.859    | 0.915<br>(2)    | 0.633    | 1.617<br>(2)    | 0.449    | 1.088   | 0.340    | 1.740   | 0.180    | 0.367   | 0.693    | <b>11.710</b><br><b>(2)</b>            | <b>0.003</b> | 3.131<br>(2)        | 0.209    |
| <b>Glu202_Glu203insGlu</b> | 1.657<br>(4)        | 0.798    | 2.923<br>(2)    | 0.232    | 1.627<br>(2)    | 0.443    | 0.028   | 0.994    | 0.335   | 0.800    | 0.198   | 0.898    | 0.517<br>(2)                           | 0.772        | 0.521<br>(2)        | 0.771    |
| <b>Asp261del</b>           | 6.612<br>(4)        | 0.158    | 2.797<br>(2)    | 0.247    | 0.253<br>(2)    | 0.881    | 0.445   | 0.721    | 1.508   | 0.216    | 1.074   | 0.363    | 0.972<br>(2)                           | 0.615        | 1.629<br>(2)        | 0.443    |
| <b>His321ins51aa</b>       | 4.269<br>(2)        | 0.118    | Fisher<br>Exact | 1.000    | Fisher<br>Exact | 0.102    | 0.146   | 0.865    | 0.528   | 0.591    | 0.254   | 0.776    | Fisher<br>Exact                        | 1.000        | Fisher<br>Exact     | 1.000    |

DF, degrees of freedom; with bold statistical significant associations

### Supplemental Figure 1

Diagrammatic presentation of the idiopathic DCM patients entered in this study, according to inclusion and exclusion criteria.

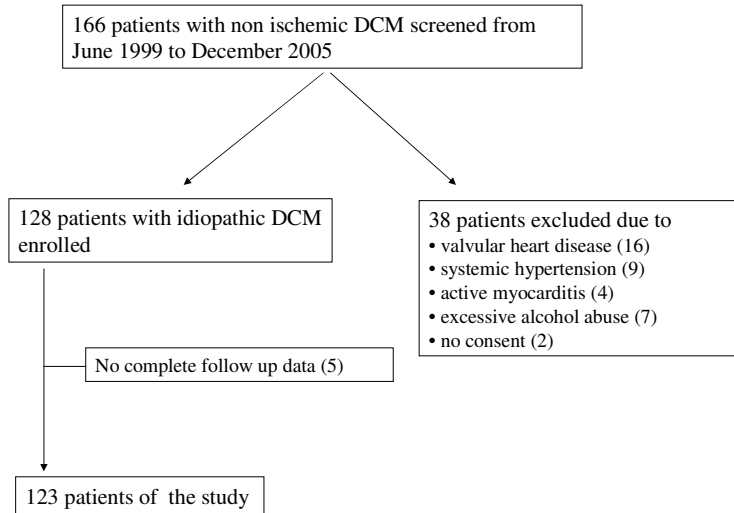

## Supplemental Figure 2

Kaplan-Meier plots for freedom from a life-threatening arrhythmic event according to left ventricular ejection fraction (A), gender (B), administration of amiodarone (C), New York Heart Association status (D), and history of sustained VT or VF episodes prior to study entry. Each event is depicted as a step down. Each censored case (death from other causes, heart transplantation, and end due to study termination) is marked with a cross. The tables at the bottom of the plots indicate the number of DCM patients at risk for each year of the follow up study.

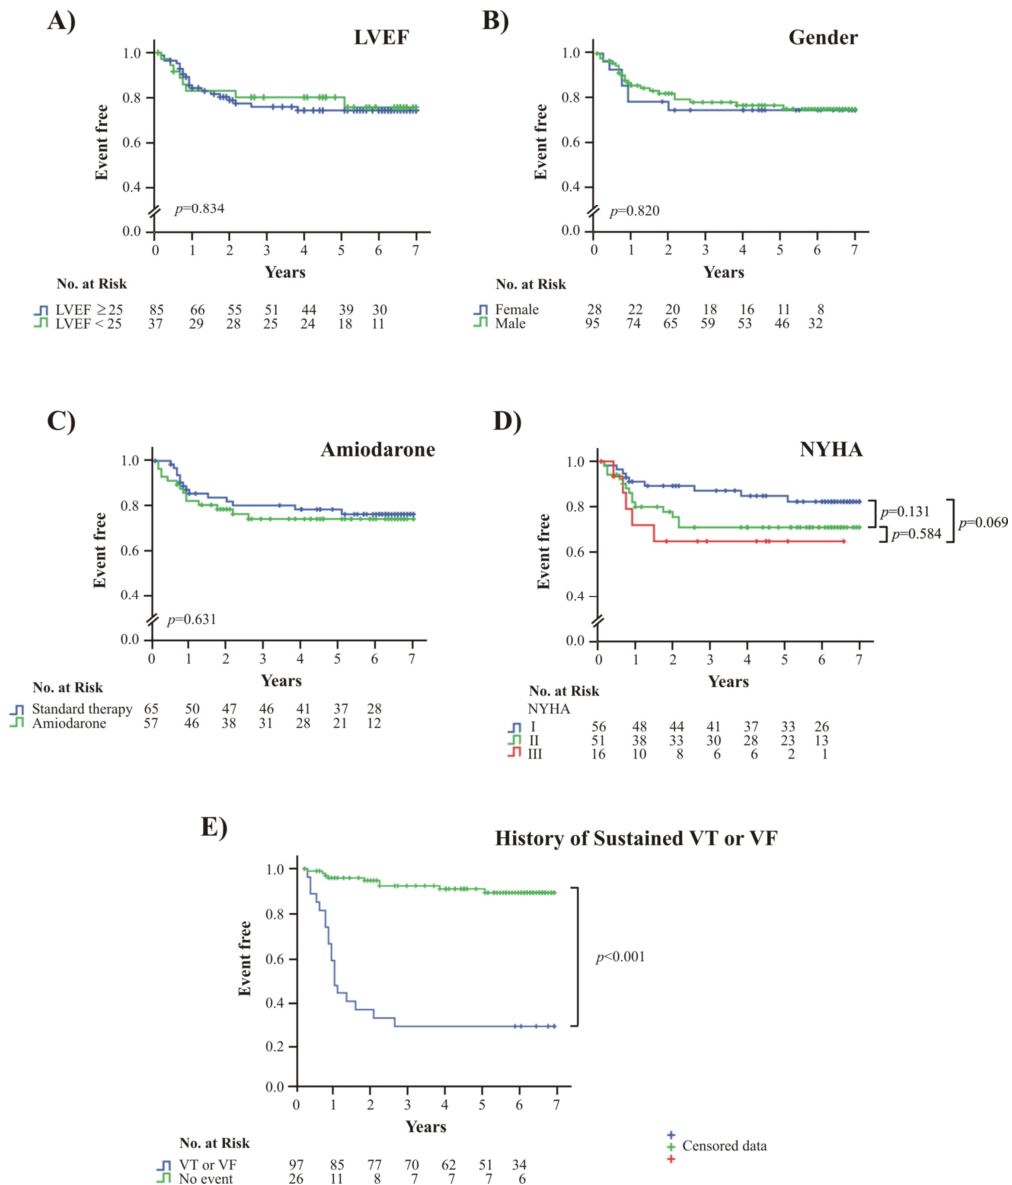

Supplement: ehn328_1.pdf [file ehn328_1.pdf]
